# Supplementary material for: The Presence of Toxocara Eggs on Dog’s Fur as Potential Zoonotic Risk in Animal-Assisted Interventions: A Systematic Review
Source: MDPI journal article supplement (doi:10.3390/ani9100827), 2019-10-19
Supplement: s1 [file s1]

**Supplementary Material – Table S1: Papers Excluded from Systematic Review**

| Authors, Year of publication   | Title                                                                                                                                                 | Journal                                               | Reason of exclusion                        |
|--------------------------------|-------------------------------------------------------------------------------------------------------------------------------------------------------|-------------------------------------------------------|--------------------------------------------|
| Ahmad et al., 2011             | Toxocariasis, its zoonotic importance and chemotherapy in dogs                                                                                        | Journal of Animal and Plant Sciences                  | Not epidemiological study                  |
| Akao and Ohta, 2007            | Toxocariasis in Japan                                                                                                                                 | Parasitology International                            | Review                                     |
| Awadallah and Salem, 2015      | Zoonotic enteric parasites transmitted from dogs in Egypt with special concern to <i>Toxocara canis</i> infection                                     | Veterinary World                                      | No significant data on dog's fur           |
| Baneth et al., 2016            | An estimation of <i>Toxocara canis</i> prevalence in dogs, environmental egg contamination and risk of human infection in the Marche region of Italy. | Veterinary Parasitology                               | No significant data on dog's fur           |
| Barnes et al., 2017            | A systematic review of zoonotic enteric parasitic diseases among nomadic and pastoral people                                                          | Plos One                                              | Systematic review                          |
| Berrett et al., 2017           | <i>Toxocara</i> Seroprevalence and Associated Risk Factors in the United States                                                                       | The American Journal of Tropical Medicine and Hygiene | No data on dog's fur                       |
| Chen et al., 2018              | Toxocariasis: a silent threat with a progressive public health impact                                                                                 | Infectious Disease of Poverty                         | Scoping Review                             |
| Chiodo et al., 2006            | Related factors to human toxocariasis in a rural community of Argentina                                                                               | Memorias Do Instituto Oswaldo Cruz                    | No significant data on dog's fur           |
| Cortés et al., 2015            | Presence of anti- <i>Toxocara canis</i> antibodies and risk factors in children from the Amecameca and Chalco regions of México                       | BMC Pediatrics                                        | Technical Advance and no data on dog's fur |
| Dantas-Torre and Otranto, 2014 | Dogs, cats, parasites, and humans in Brazil: opening the black box                                                                                    | Parasites & Vectors                                   | Review                                     |
| Deutz et al., 2005             | <i>Toxocara</i> -infestations in Austria: a study on the risk of infection of farmers, slaughterhouse staff, hunters and veterinarians                | Parasitology Research                                 | No significant data on dog's fur           |
| Diaz et al., 2018              | Dog overpopulation and diagnosis of intestinal parasites on Santa Cruz Island, Galapagos 2016                                                         | Preventive and Veterinary Medicine                    | No significant data on dog's fur           |
| Francisco López et al., 2005   | Contaminación de los parques públicos de los distritos de Lima Oeste con huevos de <i>Toxocara</i> sp.                                                | Revista de Investigaciones Veterinarias del Perú      | Article in Spanish                         |
| Gillespie and Bradbury, 2017   | A Survey of Intestinal Parasites of Domestic Dogs in Central Queensland                                                                               | Tropical Medicine and Infectious Diseases             | No significant data on dog's fur           |

|                                |                                                                                                                                              |                                                        |                                     |
|--------------------------------|----------------------------------------------------------------------------------------------------------------------------------------------|--------------------------------------------------------|-------------------------------------|
| Gothe and Reichler I., 1990    | Toxocara canis: frequency of detection and extent of infection in bitches of various breeds and husbandry and their litters in South Germany | Tierärztliche Prax                                     | Article in German                   |
| Guang-Li et al., 2019          | Zoonotic parasites carried by invasive alien species in China                                                                                | Infectious Disease of Poverty                          | Scoping Review                      |
| Keegan and Holland, 2013       | A comparison of Toxocara canis embryonation under controlled conditions in soil and hair                                                     | Journal of Helminthology                               | No significant data on dog's fur    |
| Lefebvre et al., 2006          | Prevalence of zoonotic agents in dogs visiting hospitalized people in Ontario: implications for infection control                            | Journal of Hospital Infection                          | No significant data on dog's fur    |
| McMahon et al., 2018           | Ecosystem change and zoonoses in the Anthropocene                                                                                            | Zoonoses Public Health                                 | Review                              |
| Moskvina and Ermolenko, 2016   | Helminth infections in domestic dogs from Russia                                                                                             | Veterinary World                                       | Paper Reviews                       |
| N. Thi Lan Anh et al., 2016    | Levels of Toxocara infections in dogs and cats from urban Vietnam together with associated risk factors for transmission                     | Journal of Helminthology                               | Poor information about dogs sampled |
| Nagy et al., 2011              | Hair coat contamination with zoonotic helminth eggs of farm and pet dogs and foxes.                                                          | Berliner Münchener Tierärztliche Wochenschrift         | Article in German                   |
| Nagy et al., 2011              | Hair coat contamination with zoonotic helminth eggs of farm and pet dogs and foxes                                                           | Kleintierpraxis                                        | Article in German                   |
| Oge et al, 2013                | Presence of Toxocara eggs on the hair of dogs and cats                                                                                       | Ankara Üniversitesi Veteriner Fakültesi Dergisi        | Article in Turkish                  |
| Overgaauw, 1997                | Aspects of Toxocara Epidemiology: Toxocarosis in Dogs and Cats                                                                               | Critical Reviews in Microbiology                       | Review                              |
| Overgaauw and van Knapen, 2004 | Verwaarloosbaar risico op viscerale of oculaire larva migrans door het aaien van een hond                                                    | Nederlands Tijdschrift voor Geneeskunde                | Letters to the editors in German    |
| Overgaauw and van Knapen, 2004 | Negligible risk of visceral or ocular larva migrans from petting a dog                                                                       | Nederlands Tijdschrift voor Geneeskunde                | Letters to the editors in German    |
| Overgaauw, 2013                | Veterinary and public health aspects of Toxocara spp                                                                                         | Veterinary Parasitology                                | Not epidemiological study           |
| Sadzikowski et al., 2009       | Parasite eggs on dogs' and cats' hair                                                                                                        | Medycyna Weterynaryjna                                 | Article in Polish                   |
| Strube et al., 2013            | Toxocarosis in dogs - important aspects for the veterinary practice                                                                          | Tierärztliche Praxis Ausgabe K: Kleintiere - Heimtiere | No significant data on dog's fur    |
| Traversa, 2012                 | Pet roundworms and hookworms: a continuing need for global worming.                                                                          | Parasites & Vectors                                    | Review                              |

|                              |                                                                        |                                        |                                  |
|------------------------------|------------------------------------------------------------------------|----------------------------------------|----------------------------------|
| Wolfe and Wright,<br>2004    | Parasitic nematode eggs in fur samples from dogs                       | Veterinary Record                      | No significant data on dog's fur |
| Wright, 2015                 | Controversies and practicalities of human toxocarosis control          | Veterinary Times                       | No significant data on dog's fur |
| Youssef and Uga,<br>2014     | Review of Parasitic Zoonoses in Egypt                                  | Tropical Medicine and Health           | Review                           |
| Zibaei and Sadjjadi,<br>2017 | Trend of toxocariasis in Iran: a review on human and animal dimensions | Iranian Journal of Veterinary Research | Review Article                   |
